# Supplementary material for: Understanding Health-Related Quality of Life in Kidney Transplant Recipients: The Role of Symptom Experience and Illness Perceptions
Source: PubMed Central journal article supplement (PMC10134035; doi:10.3389/ti.2023.10837), 2023-04-13
Supplement: DataSheet1.pdf [file DataSheet1.pdf]

Supplementary file

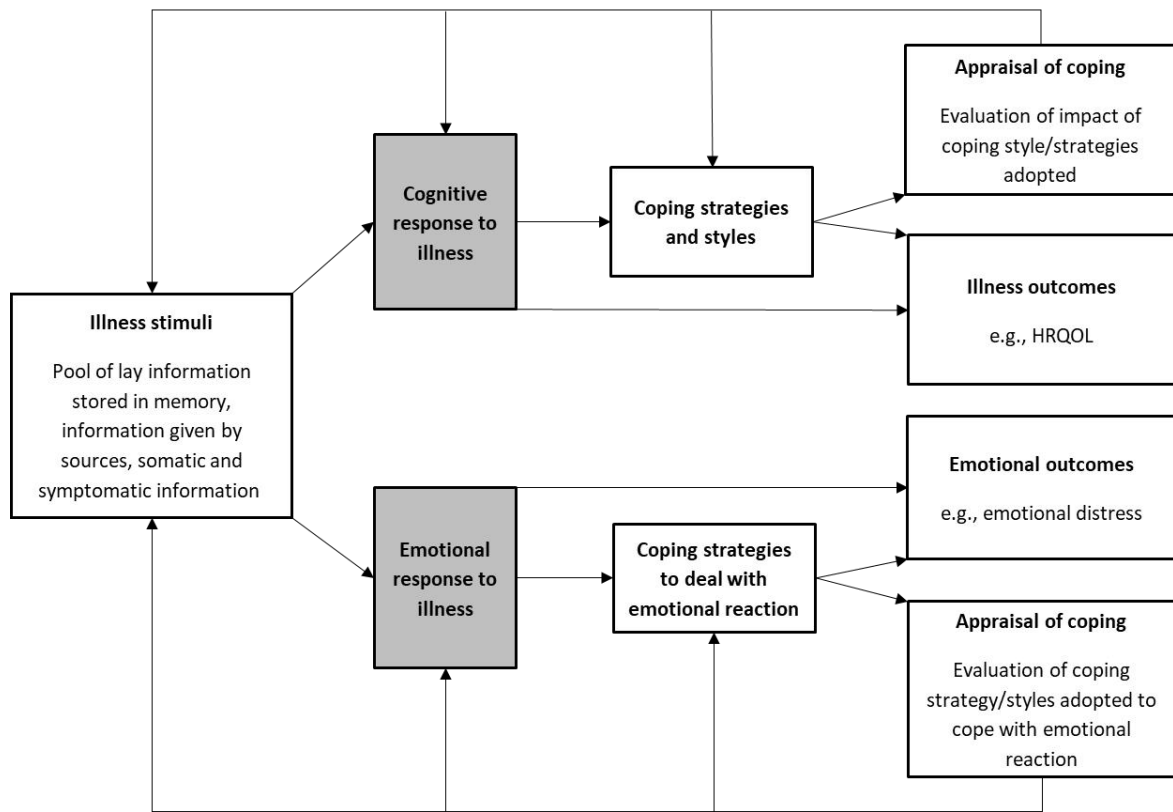

**Figure S1.** Visual representation of Leventhal's Common Sense Model of self-regulation (adapted from Hagger & Orbell, 2003). The boxes in grey represent the 'illness perceptions'.

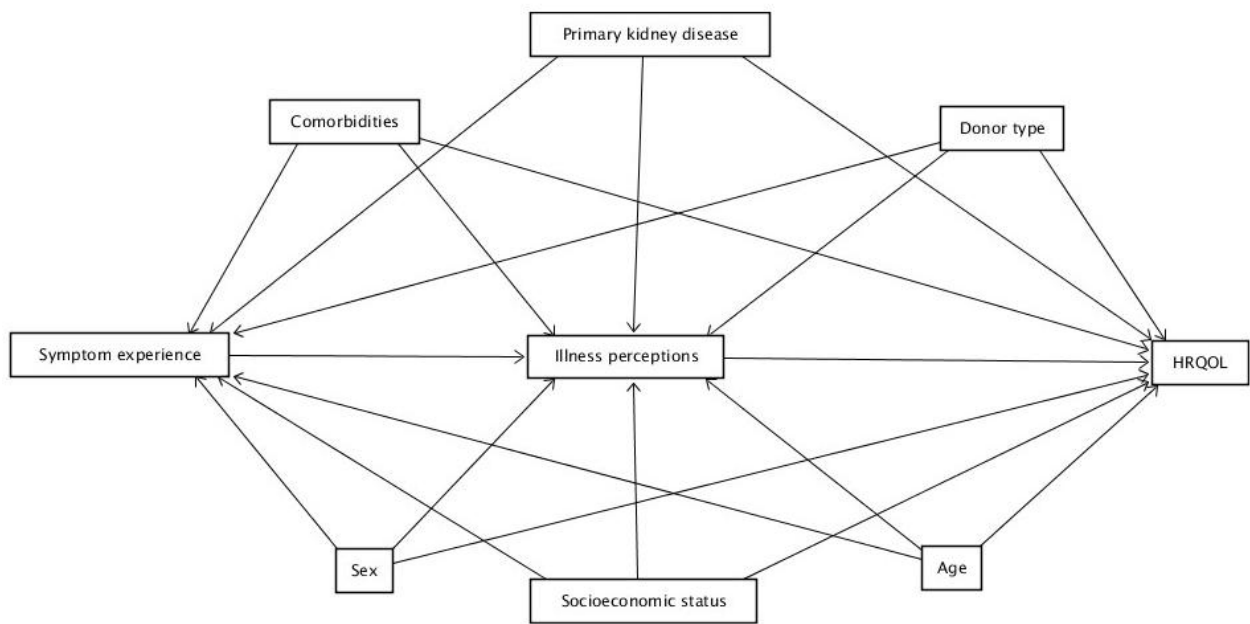

**Figure S2.** Directed acyclic graphs (DAGs) structured the potential exposure-outcome, exposure-mediator, and mediator-outcome confounders. Abbreviations: HRQOL, health-related quality of life.

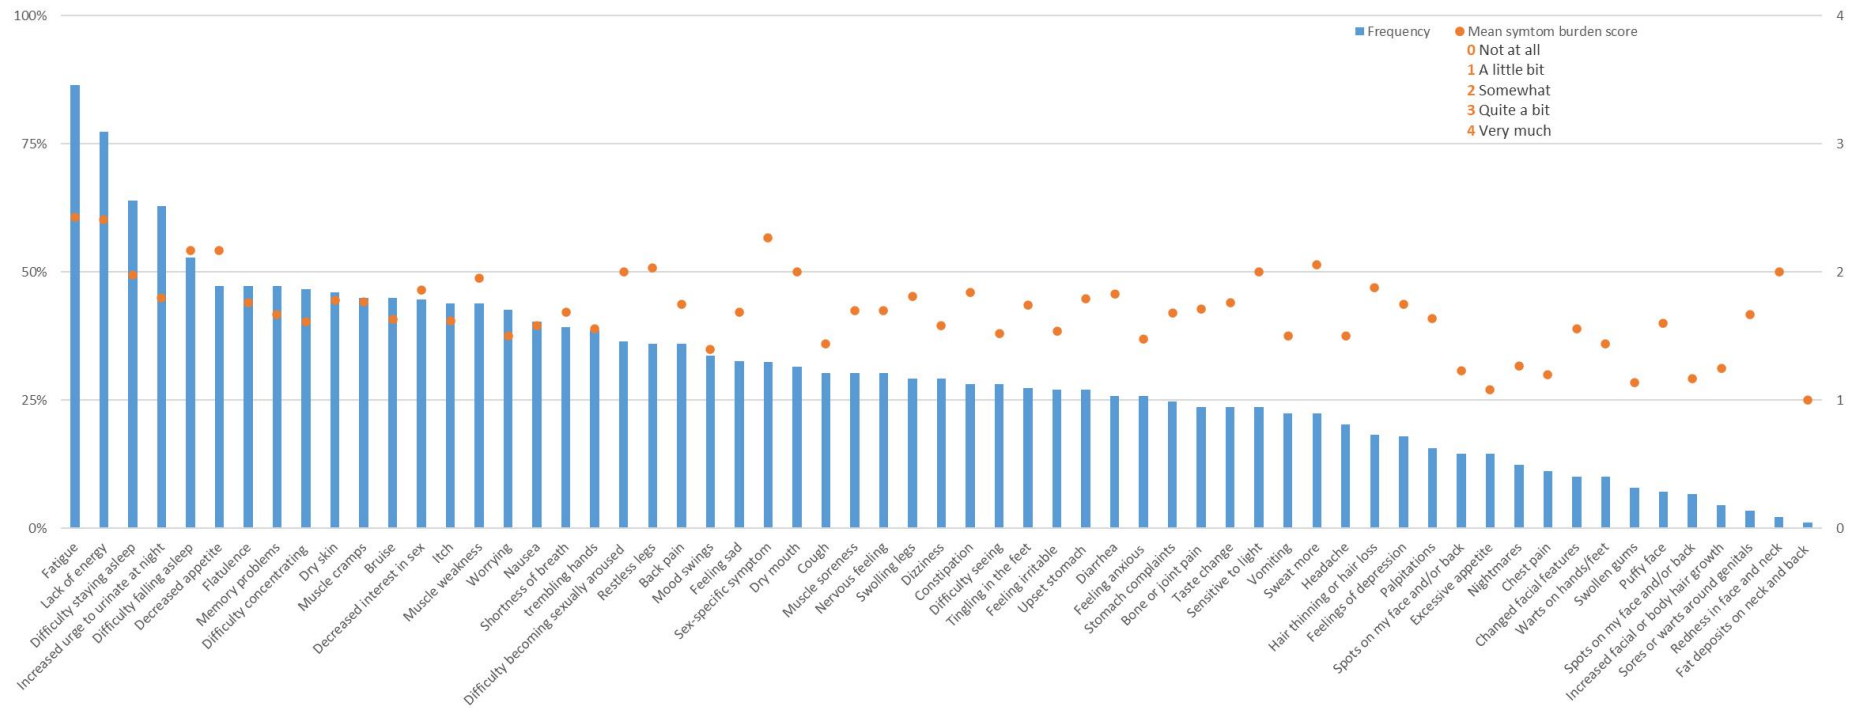

**Figure S3.** Symptom experience of the study population at T0 (n=90). One patient with more than 5 missing values in their symptom checklist was excluded from the descriptive statistics in the figure.

**Table S1.** Clinical and demographic characteristics of participants and non-participants.

| <b>Characteristics</b>                          | <b>Participants<br/>(n=156)</b> | <b>Non-participants<br/>(n=243)</b> |
|-------------------------------------------------|---------------------------------|-------------------------------------|
| <b>Mean age (SD)<sup>a</sup></b>                | 53.3 (13.5)                     | 53.1 (14.5)                         |
| <b>Female, n(%)</b>                             | 56 (36)                         | 94 (39)                             |
| <b>SES, n(%)<sup>a</sup></b>                    |                                 |                                     |
| Low                                             | 25 (16)                         | 57 (24)                             |
| Middle                                          | 103 (66)                        | 134 (55)                            |
| High                                            | 26 (17)                         | 46 (19)                             |
| <b>Primary kidney disease, n(%)<sup>a</sup></b> |                                 |                                     |
| Diabetes mellitus                               | 29 (19)                         | 70 (29)                             |
| Glomerulonephritis                              | 36 (23)                         | 48 (20)                             |
| Renal vascular disease                          | 18 (12)                         | 14 (6)                              |
| Other diseases                                  | 71 (46)                         | 111 (45)                            |
| <b>Donor type, n(%)<sup>a</sup></b>             |                                 |                                     |
| Living donor                                    | 89 (57)                         | 134 (55)                            |
| Deceased donor                                  | 65 (42)                         | 109 (45)                            |
| <b>Comorbidities, n(%)<sup>a</sup></b>          |                                 |                                     |
| Diabetes mellitus                               | 18 (12)                         | 42 (17)                             |
| Cardiovascular event                            | 24 (15)                         | 35 (14)                             |
| Cerebrovascular event                           | 8 (5)                           | 13 (5)                              |

<sup>a</sup>Missing values: diabetes mellitus, cardiovascular event, cerebrovascular event (participants: 37.8%, 32.1%, 32.1%; non-participants: 47.7%, 44.0%, 44.4%). Participants had 1% missing values in age, SES, primary kidney disease and donor type. Non-participants had 2% missing values in SES. Abbreviations: SES, socioeconomic status; SD, standard deviation.

**Table S2.** Impact of symptom experience at T0 on HRQOL at T1 and the mediation effect of illness perceptions (n=87, complete case analysis).

|                                     | Estimates                       | Crude $\beta$ (95%CI) | P-value | Adjusted $\beta$ (95%CI) <sup>a</sup> | P-value |
|-------------------------------------|---------------------------------|-----------------------|---------|---------------------------------------|---------|
| <b>Number of symptoms and HRQOL</b> |                                 |                       |         |                                       |         |
| <b>PCS</b>                          | <b>Total effect<sup>b</sup></b> | -0.17 (-0.34, -0.01)  | 0.04    | -0.15 (-0.32, 0.03)                   | 0.09    |
|                                     | <b>Direct effect</b>            | -0.10 (-0.26, 0.07)   | 0.24    | -0.08 (-0.24, 0.09)                   | 0.35    |
|                                     | <b>Indirect effect</b>          | -0.07 (-0.15, -0.02)  |         | -0.07 (-0.14, -0.005)                 |         |
| <b>MCS</b>                          | <b>Total effect</b>             | -0.24 (-0.43, -0.05)  | 0.01    | -0.24 (-0.43, -0.05)                  | 0.02    |
|                                     | <b>Direct effect</b>            | -0.10 (-0.26, 0.07)   | 0.25    | -0.12 (-0.28, 0.04)                   | 0.14    |
|                                     | <b>Indirect effect</b>          | -0.15 (-0.26, -0.05)  |         | -0.11 (-0.23, -0.01)                  |         |
| <b>Symptom burden and HRQOL</b>     |                                 |                       |         |                                       |         |
| <b>PCS</b>                          | <b>Total effect</b>             | -0.05 (-0.13, 0.02)   | 0.13    | -0.04 (-0.12, 0.03)                   | 0.24    |
|                                     | <b>Direct effect</b>            | -0.02 (-0.09, 0.04)   | 0.48    | -0.02 (-0.09, 0.05)                   | 0.63    |
|                                     | <b>Indirect effect</b>          | -0.03 (-0.06, -0.01)  |         | -0.03 (-0.06, -0.001)                 |         |
| <b>MCS</b>                          | <b>Total effect</b>             | -0.08 (-0.16, 0.01)   | 0.07    | -0.07 (-0.15, 0.02)                   | 0.11    |
|                                     | <b>Direct effect</b>            | -0.02 (-0.09, 0.05)   | 0.63    | -0.02 (-0.09, 0.05)                   | 0.54    |
|                                     | <b>Indirect effect</b>          | -0.06 (-0.10, -0.02)  |         | -0.04 (-0.10, -0.002)                 |         |

The p-values of the interaction term between symptom experience and illness perception ranged from 0.13 to 0.97. Abbreviations: CI, confidence interval; HRQOL, health-related quality of life; MCS, mental component scale; PCS, mental component scale; RR, risk ratio; SD, standard deviation.

<sup>a</sup>The adjusted variables include age, sex, socioeconomic status (continuous scale), primary kidney disease, and donor type.

<sup>b</sup>The total effect is the sum of the direct and indirect effects.

**Table S3.** Impact of symptom experience (based on the DSI-items only) at T0 on HRQOL at T1 and the mediation effect of illness perceptions (n=90).

|                                     | Estimates                       | Crude $\beta$ (95%CI) | P-value | Adjusted $\beta$ (95%CI) <sup>a</sup> | P-value | Adjusted $\beta$ (95%CI) <sup>b</sup> | P-value |
|-------------------------------------|---------------------------------|-----------------------|---------|---------------------------------------|---------|---------------------------------------|---------|
| <b>Number of symptoms and HRQOL</b> |                                 |                       |         |                                       |         |                                       |         |
| <b>PCS</b>                          | <b>Total effect<sup>c</sup></b> | -0.28 (-0.55, -0.01)  | 0.04    | -0.25 (-0.52, 0.02)                   | 0.07    | -0.23 (-0.51, 0.05)                   | 0.10    |
|                                     | <b>Direct effect</b>            | -0.16 (-0.43, 0.11)   | 0.24    | -0.14 (-0.41, 0.12)                   | 0.28    | -0.13 (-0.40, 0.14)                   | 0.29    |
|                                     | <b>Indirect effect</b>          | -0.12 (-0.21, -0.02)  |         | -0.11 (-0.22, 0.002)                  |         | -0.10 (-0.21, 0.02)                   |         |
| <b>MCS</b>                          | <b>Total effect</b>             | -0.46 (-0.76, -0.15)  | 0.004   | -0.43 (-0.72, -0.13)                  | 0.01    | -0.41 (-0.72, -0.11)                  | 0.01    |
|                                     | <b>Direct effect</b>            | -0.22 (-0.48, 0.05)   | 0.11    | -0.25 (-0.50, 0.01)                   | 0.06    | -0.24 (-0.51, 0.02)                   | 0.07    |
|                                     | <b>Indirect effect</b>          | -0.24 (-0.41, -0.07)  |         | -0.18 (-0.36, -0.0002)                |         | -0.17 (-0.36, 0.02)                   |         |
| <b>Symptom burden and HRQOL</b>     |                                 |                       |         |                                       |         |                                       |         |
| <b>PCS</b>                          | <b>Total effect</b>             | -0.09 (-0.20, 0.03)   | 0.15    | -0.08 (-0.19, 0.04)                   | 0.22    | -0.07 (-0.19, 0.06)                   | 0.29    |
|                                     | <b>Direct effect</b>            | -0.04 (-0.15, 0.07)   | 0.48    | -0.03 (-0.15, 0.08)                   | 0.56    | -0.03 (-0.15, 0.09)                   | 0.63    |
|                                     | <b>Indirect effect</b>          | -0.05 (-0.09, -0.01)  |         | -0.04 (-0.09, 0.004)                  |         | -0.04 (-0.08, 0.01)                   |         |
| <b>MCS</b>                          | <b>Total effect</b>             | -0.13 (-0.27, 0.003)  | 0.05    | -0.12 (-0.25, 0.01)                   | 0.08    | -0.11 (-0.25, 0.03)                   | 0.12    |
|                                     | <b>Direct effect</b>            | -0.04 (-0.16, 0.07)   | 0.47    | -0.05 (-0.16, 0.07)                   | 0.41    | -0.04 (-0.16, 0.07)                   | 0.46    |
|                                     | <b>Indirect effect</b>          | -0.09 (-0.16, -0.02)  |         | -0.07 (-0.14, 0.01)                   |         | -0.07 (-0.14, 0.01)                   |         |

The p-values of the interaction term between symptom experience and illness perception ranged from 0.13 to 0.98. Abbreviations: CI, confidence interval; DSI, the dialysis symptom index questionnaire; HRQOL, health-related quality of life; MCS, mental component scale; PCS, mental component scale; RR, risk ratio; SD, standard deviation.

<sup>a</sup>The adjusted variables include age, sex, SES, primary kidney disease, and donor type.

<sup>b</sup>The adjusted variables include age, sex, SES, primary kidney disease donor type, and comorbidities.

<sup>c</sup>The total effect is the sum of the direct and indirect effects.

**Table S4.** Impact of symptom burden (based on the remaining symptoms) at T0 on HRQOL at T1, and the mediation effect of illness perceptions (n=90).

|                                     | Estimates                       | Crude $\beta$ (95%CI) | P-value | Adjusted $\beta$ (95%CI) <sup>a</sup> | P-value | Adjusted $\beta$ (95%CI) <sup>b</sup> | P-value |
|-------------------------------------|---------------------------------|-----------------------|---------|---------------------------------------|---------|---------------------------------------|---------|
| <b>Number of symptoms and HRQOL</b> |                                 |                       |         |                                       |         |                                       |         |
| <b>PCS</b>                          | <b>Total effect<sup>c</sup></b> | -0.35 (-0.71, 0.01)   | 0.06    | -0.32 (-0.71, 0.06)                   | 0.10    | -0.30 (-0.70, 0.11)                   | 0.15    |
|                                     | <b>Direct effect</b>            | -0.21 (-0.57, 0.14)   | 0.24    | -0.20 (-0.57, 0.17)                   | 0.30    | -0.19 (-0.57, 0.20)                   | 0.34    |
|                                     | <b>Indirect effect</b>          | -0.14 (-0.27, -0.01)  |         | -0.12 (-0.27, 0.02)                   |         | -0.11 (-0.26, 0.04)                   |         |
| <b>MCS</b>                          | <b>Total effect</b>             | -0.38 (-0.81, 0.04)   | 0.08    | -0.40 (-0.83, 0.02)                   | 0.06    | -0.38 (-0.82, 0.07)                   | 0.10    |
|                                     | <b>Direct effect</b>            | -0.09 (-0.44, 0.27)   | 0.64    | -0.19 (-0.55, 0.18)                   | 0.31    | -0.18 (-0.56, 0.19)                   | 0.34    |
|                                     | <b>Indirect effect</b>          | -0.30 (-0.54, -0.06)  |         | -0.22 (-0.47, 0.04)                   |         | -0.2 (-0.46, 0.07)                    |         |
| <b>Symptom burden and HRQOL</b>     |                                 |                       |         |                                       |         |                                       |         |
| <b>PCS</b>                          | <b>Total effect</b>             | -0.13 (-0.28, 0.03)   | 0.12    | -0.12 (-0.28, 0.05)                   | 0.17    | -0.11 (-0.28, 0.06)                   | 0.21    |
|                                     | <b>Direct effect</b>            | -0.07 (-0.22, 0.09)   | 0.40    | -0.06 (-0.22, 0.09)                   | 0.43    | -0.06 (-0.22, 0.10)                   | 0.46    |
|                                     | <b>Indirect effect</b>          | -0.06 (-0.11, 0.004)  |         | -0.05 (-0.11, 0.01)                   |         | -0.05 (-0.11, 0.02)                   |         |
| <b>MCS</b>                          | <b>Total effect</b>             | -0.13 (-0.32, 0.05)   | 0.16    | -0.13 (-0.32, 0.06)                   | 0.17    | -0.12 (-0.31, 0.07)                   | 0.23    |
|                                     | <b>Direct effect</b>            | -0.01 (-0.17, 0.15)   | 0.90    | -0.04 (-0.20, 0.12)                   | 0.62    | -0.03 (-0.20, 0.13)                   | 0.68    |
|                                     | <b>Indirect effect</b>          | -0.12 (-0.22, -0.02)  |         | -0.09 (-0.2, 0.02)                    |         | -0.08 (-0.20, 0.03)                   |         |

The p-values of the interaction term between symptom experience and illness perception ranged from 0.13 to 0.98. Abbreviations: CI, confidence interval; HRQOL, health-related quality of life; MCS, mental component scale; PCS, mental component scale; RR, risk ratio; SD, standard deviation.

<sup>a</sup>The adjusted variables include age, sex, SES, primary kidney disease, and donor type.

<sup>b</sup>The adjusted variables include age, sex, SES, primary kidney disease donor type, and comorbidities.

<sup>c</sup>The total effect is the sum of the direct and indirect effects.
